# Supplementary material for: Ammonia sets limit to life and alters physiology independently of pH in Halomonas meridiana
Source: Research Square preprint supplement (doi:10.21203/rs.3.rs-6178140/v1), 2025-03-24
Supplement: Supplementary file 1 [file d527ef039d901bcca225df09.xlsx]

## Sheet: Figure 1a
Ammonia (M)	pH
0 (PC)	5.99	6.13	6.1	6.01
0.01	7.95	8.03	8.15	7.9
0.025	8.85	8.96	8.96	8.83
0.05	9.38	9.4	9.36	9.39
0.1	9.73	9.74	9.73	9.74
0.25	10.21	10.14	10.21	10.18
0.5	10.46	10.48	10.49	10.47
1	10.79	10.77	10.75	10.79

## Sheet: Figure 1c
	O2 (µmol/L)
pH	Ammonia				NaOH
8.05	240.4	235.46	238.4	232.52	241.06	240.32	239.38	238.1
8.96	232.1	231.11	231.37	230.75	232.83	230.99	229.81	231.29
9.38	231.63	230.97	231.2	228.36	230.7	230.17	229.7	230.95
9.73	227.25	226.05	226.64	226.88	228.31	226.66	225.72	226.74
10.18	227.5	228.6	227.96	227.48	226.66	230.29	226.51	226.45
10.49	226.24	227.69	225.71	225.63	225.96	224.99	224.33	225.2
10.78	226.24	227.69	225.71	225.63	223.67	223.39	230.54	225.8

## Sheet: Figure 1d
	aw
pH	Ammonia				NaOH
8.05	0.9303	0.9547	0.9444	0.9507	0.9444	0.9341	0.9625	0.9686
8.96	0.9591	0.9591	0.9521	0.9299	0.9765	0.9484	0.9484	0.9376
9.38	0.961	0.9556	0.9633	0.927	0.9339	0.9768	0.9681	0.9484
9.73	0.9716	0.9584	0.9324	0.9482	0.9758	0.9264	0.9647	0.967
10.18	0.9805	0.9445	0.9615	0.9569	0.9793	0.9587	0.9665	0.958
10.49	0.99	0.9793	0.9533	0.9777	0.9364	0.9605	0.9827	0.9667
10.78	0.9914	0.9653	0.9869	0.9588	0.9784	0.9633	0.9927	0.947

## Sheet: Figure 2a
Ammonia (M)	Cell viability (CFU/mL)
0 (PC)	14800000000000	16400000000000	16300000000000
0.01	6170000000000	4080000000000	9000000000000
0.025	5250000000000	12300000000000	12600000000000
0.05	250000000000	583000000000	417000000000
0.1	0	0	0
0.25	0	0	0
0.5	0	0	0
1	0	0	0

## Sheet: Figure 2b
Time (h)	0 M (PC)				0.01 M ammonia				0.025 M ammonia				0.05 M ammonia				0.1 M ammonia				0.25 M ammonia				0.5 M ammonia				1 M ammonia
0	0.056	0.1015	0.06025	0.0365	0.0645	0.077	0.065	0.04325	0.0685	0.089	0.07925	0.08625	0.06625	0.06825	0.07375	0.0525	0.0715	0.06925	0.0685	0.05825	0.0535	0.0685	0.05525	0.06325	0.03005	0.0525	0.0525	0.05475	0.04225	0.052	0.017425
0.5	0.06175	0.127	0.06175	0.034	0.07225	0.09725	0.08475	0.0605	0.07825	0.09575	0.089	0.081	0.06975	0.07975	0.07	0.06675	0.06975	0.07075	0.0805	0.0705	0.058	0.08325	0.058	0.088	0.04025	0.048	0.048	0.08075	0.08425	0.047	0.039225
1	0.06925	0.14325	0.0725	0.03625	0.09075	0.12975	0.11925	0.09225	0.094	0.11	0.0995	0.09	0.081	0.095	0.07575	0.08125	0.0735	0.0735	0.08325	0.07225	0.066	0.09275	0.066	0.094	0.032	0.0505	0.0505	0.07475	0.12825	0.04675	0.03005
1.5	0.08775	0.16475	0.082	0.0485	0.1295	0.18025	0.16875	0.12	0.11	0.12975	0.12675	0.112	0.0925	0.11375	0.082	0.09775	0.081	0.076	0.09075	0.07325	0.08325	0.10725	0.08075	0.0955	0.032975	0.04875	0.04875	0.07325	0.10475	0.043	0.045175
2	0.10425	0.195	0.1075	0.05725	0.19125	0.218	0.21575	0.1735	0.14025	0.1635	0.173	0.1455	0.113	0.135	0.09575	0.1175	0.091	0.084	0.098	0.083	0.09275	0.10425	0.085	0.1005	0.033	0.04875	0.04875	0.0675	0.0975	0.043	0.0451
2.5	0.116	0.22275	0.1525	0.09475	0.2865	0.267	0.281	0.24725	0.18075	0.24325	0.26275	0.207	0.13825	0.16725	0.12025	0.148	0.091	0.08475	0.104	0.08275	0.0965	0.09875	0.0835	0.10225	0.042175	0.04825	0.04825	0.06125	0.09	0.0415	0.04455
3	0.12925	0.26675	0.184	0.12425	0.3895	0.3465	0.38425	0.35075	0.23	0.3135	0.33825	0.29775	0.17475	0.213	0.1545	0.19525	0.0965	0.08725	0.10725	0.08525	0.0975	0.0965	0.088	0.097	0.0361	0.04675	0.04675	0.06025	0.09625	0.04075	0.04425
3.5	0.1505	0.36575	0.237	0.1645	0.499	0.47825	0.52125	0.48775	0.2705	0.4	0.437	0.40625	0.223	0.2725	0.19525	0.253	0.116	0.086	0.112	0.08925	0.0725	0.098	0.088	0.0975	0.037325	0.04825	0.04825	0.058	0.096	0.04	0.044925
4	0.19925	0.469	0.32475	0.22925	0.62	0.6655	0.70675	0.6305	0.3345	0.53	0.575	0.5325	0.29	0.332	0.23675	0.326	0.1235	0.087	0.115	0.0915	0.06225	0.09	0.081	0.09575	0.0406	0.04625	0.04625	0.057	0.11	0.0405	0.044025
4.5	0.26275	0.685	0.435	0.38275	0.87	0.86225	0.9055	0.80475	0.40625	0.7125	0.7795	0.66525	0.3885	0.418	0.2945	0.41175	0.13725	0.08775	0.123	0.09875	0.06225	0.09025	0.0725	0.09375	0.03755	0.0475	0.0475	0.059	0.1145	0.0385	0.035275
5	0.36875	0.9025	0.64825	0.63275	1.1635	1.05925	1.10625	1.04425	0.50175	0.94975	1.01125	0.85425	0.51225	0.5275	0.3855	0.5225	0.158	0.09425	0.13075	0.11175	0.0615	0.0895	0.0695	0.09375	0.0389	0.04775	0.04775	0.05925	0.10875	0.03725	0.04465
5.5	0.52825	1.10975	0.88475	0.875	1.35275	1.25275	1.28625	1.25675	0.654	1.1715	1.22	1.1815	0.686	0.655	0.48225	0.66975	0.217	0.0965	0.13575	0.133	0.062	0.0875	0.06775	0.0925	0.03855	0.04775	0.04775	0.0585	0.11075	0.03725	0.0439
6	0.7325	1.30625	1.08425	1.085	1.51575	1.4265	1.47	1.4395	0.832	1.3805	1.44475	1.3875	0.86375	0.80875	0.62825	0.896	0.27125	0.1025	0.155	0.16025	0.06325	0.0895	0.06525	0.0905	0.0349	0.0475	0.0475	0.05575	0.106	0.0365	0.0431
6.5	0.98975	1.48875	1.30875	1.30425	1.659	1.5675	1.602	1.60775	1.018	1.55	1.62625	1.587	1.0785	0.962	0.7995	1.2875	0.3155	0.103	0.1695	0.2005	0.06425	0.08625	0.06325	0.09	0.038175	0.048	0.048	0.05925	0.10625	0.03675	0.04335
7	1.1955	1.63125	1.4995	1.4905	1.77675	1.70575	1.7435	1.7435	1.191	1.66	1.738	1.757	1.394	1.32325	0.9855	1.556	0.33125	0.10925	0.1845	0.24725	0.06525	0.087	0.06325	0.086	0.031775	0.04725	0.04725	0.066	0.10225	0.03625	0.0428
7.5	1.361	1.771	1.66875	1.6355	1.87125	1.79675	1.83825	1.84275	1.33525	1.76225	1.81075	1.90725	1.64375	1.652	1.29825	1.79275	0.346	0.11975	0.21075	0.34125	0.0665	0.086	0.06725	0.087	0.035675	0.04775	0.04775	0.06875	0.09625	0.037	0.04255
8	1.5205	1.88975	1.8095	1.7765	1.9835	1.9115	1.93375	1.9645	1.50975	1.85125	1.92	2.0375	1.8835	1.93	1.57675	2.04475	0.39625	0.13175	0.2335	0.35475	0.0645	0.0835	0.05575	0.084	0.03145	0.04625	0.04625	0.07875	0.094	0.0345	0.042575
8.5	1.65025	2.01	1.93625	1.907	2.072	2.0235	2.02125	2.0655	1.60625	1.9345	1.986	2.1465	2.08275	2.1765	1.84325	2.27075	0.479	0.15	0.273	0.403	0.06775	0.0805	0.0555	0.086	0.0295	0.045	0.045	0.06425	0.0825	0.0355	0.042575
9	1.76375	2.0925	2.05625	2.0165	2.14475	2.10675	2.08525	2.14175	1.6935	1.99	2.06725	2.24125	2.27925	2.41625	2.0215	2.49975	0.61425	0.16925	0.30575	0.45675	0.06275	0.08025	0.05675	0.08725	0.03305	0.0445	0.0445	0.06525	0.0825	0.034	0.036275
9.5	1.884	2.174	2.1525	2.1	2.218	2.17125	2.17625	2.2435	1.78675	2.014	2.1355	2.33575	2.4825	2.62675	2.20625	2.71625	0.7655	0.1995	0.38125	0.5525	0.0645	0.0795	0.05525	0.0835	0.030075	0.04575	0.04575	0.06775	0.0875	0.0325	0.04235
10	1.997	2.23825	2.2405	2.195	2.2825	2.2975	2.224	2.333	1.8555	2.07575	2.20275	2.43425	2.65875	2.84	2.4015	2.88175	0.95925	0.24225	0.44825	0.7585	0.0605	0.07975	0.05475	0.08375	0.033275	0.04375	0.04375	0.06475	0.08575	0.0375	0.042525
10.5	2.09825	2.292	2.32025	2.28425	2.354	2.34875	2.29775	2.405	1.8925	2.06575	2.254	2.52125	2.82475	3.022	2.5905	3.049	1.20725	0.301	0.56	1.0075	0.06225	0.07775	0.05475	0.0805	0.028725	0.0445	0.0445	0.06125	0.092	0.032	0.0422
11	2.18725	2.35025	2.378	2.36525	2.416	2.41075	2.354	2.4865	1.95475	2.01325	2.2335	2.6005	2.9405	3.1995	2.744	3.1785	1.4685	0.38775	0.697	1.2555	0.06125	0.077	0.05275	0.07925	0.02925	0.04525	0.04525	0.056	0.09675	0.03525	0.042025
11.5	2.28225	2.40725	2.45725	2.4205	2.45075	2.42925	2.404	2.55375	1.98175	1.9915	2.21675	2.64525	3.026	3.3385	2.90125	3.263	1.67375	0.52375	0.8465	1.555	0.0615	0.0785	0.0525	0.0775	0.02825	0.04575	0.04575	0.064	0.0975	0.036	0.042325
12	2.36175	2.4565	2.5175	2.501	2.4845	2.446	2.43725	2.63675	2.00975	1.96075	2.19875	2.7065	3.12425	3.46675	3.0235	3.3355	1.892	0.644	0.99975	1.80125	0.06	0.07525	0.05325	0.074	0.026475	0.046	0.046	0.065	0.09625	0.03075	0.04235
12.5	2.45925	2.523	2.587	2.556	2.51225	2.49025	2.48925	2.692	2.01775	1.98975	2.191	2.7185	3.21225	3.563	3.138	3.39075	2.09	0.83425	1.16025	2.07	0.05925	0.07275	0.05225	0.07525	0.026725	0.04425	0.04425	0.062	0.09475	0.03025	0.0423
13	2.52825	2.59725	2.666	2.622	2.53925	2.55625	2.52875	2.75425	1.998	2.0165	2.14975	2.73175	3.32375	3.5715	3.169	3.429	2.2635	0.9995	1.272	2.3175	0.058	0.074	0.05275	0.07225	0.025675	0.0485	0.0485	0.06125	0.09525	0.03075	0.0417
13.5	2.59225	2.661	2.727	2.69175	2.5575	2.54875	2.58675	2.8315	1.986	2.03825	2.218	2.74875	3.36675	3.595	3.333	3.436	2.41475	1.1785	1.41325	2.50125	0.06075	0.07225	0.051	0.07075	0.026775	0.0485	0.0485	0.06025	0.09675	0.027	0.0406
14	2.6615	2.71725	2.79725	2.73275	2.57075	2.55775	2.61375	2.857	1.93275	2.0515	2.265	2.74475	3.50325	3.585	3.3695	3.478	2.5665	1.3215	1.48925	2.68175	0.0625	0.0735	0.05225	0.07025	0.017	0.06075	0.06075	0.06125	0.09425	0.03125	0.04235
14.5	2.7085	2.7745	2.843	2.7805	2.55575	2.5865	2.62425	2.92025	1.89225	2.18025	2.28475	2.7435	3.55975	3.58675	3.48275	3.46625	2.698	1.4355	1.59325	2.86775	0.06225	0.0715	0.052	0.07	0.0252	0.05675	0.05675	0.05875	0.0965	0.0255	0.042775
15	2.7605	2.831	2.89775	2.79525	2.5515	2.53925	2.61575	2.94425	1.85975	2.11575	2.304	2.73675	3.58725	3.5425	3.49125	3.4485	2.79675	1.5175	1.67675	3.03325	0.06125	0.07325	0.0505	0.0685	0.023375	0.05675	0.05675	0.05975	0.0945	0.03075	0.04185
15.5	2.80575	2.89175	2.94425	2.801	2.523	2.52325	2.62025	2.99475	1.8455	2.1845	2.331	2.73725	3.59675	3.55975	3.46	3.415	2.866	1.578	1.72825	3.179	0.0575	0.07025	0.05075	0.0685	0.014675	0.05475	0.05475	0.05925	0.09175	0.0305	0.04235
16	2.832	2.92725	2.99175	2.8185	2.50825	2.52725	2.5995	3.00475	1.82675	2.213	2.357	2.71625	3.6065	3.549	3.468	3.36425	2.9225	1.672	1.74775	3.301	0.06075	0.06825	0.0515	0.0685	0.025425	0.05975	0.05975	0.05675	0.09025	0.03125	0.0422
16.5	2.85975	2.9845	3.01775	2.82475	2.496	2.50675	2.55675	3.02325	1.8455	2.2275	2.38825	2.69275	3.64275	3.6035	3.468	3.3195	2.9415	1.7385	1.81675	3.37475	0.0615	0.0715	0.049	0.0665	0.0255	0.0485	0.0485	0.054	0.08675	0.02425	0.042875
17	2.88225	3.03775	3.04375	2.80775	2.47175	2.5155	2.52375	3.05225	1.843	2.2655	2.41125	2.678	3.5995	3.6025	3.45725	3.30475	2.94125	1.7835	1.871	3.472	0.06175	0.072	0.04775	0.06675	0.01095	0.0485	0.0485	0.0555	0.0855	0.03475	0.042925
17.5	2.89625	3.0495	3.05575	2.796	2.4515	2.5175	2.49225	3.03625	1.8375	2.341	2.431	2.6525	3.512	3.6345	3.332	3.29425	2.96725	1.8235	1.89675	3.50075	0.0565	0.06875	0.05025	0.0685	0.02545	0.04425	0.04425	0.05775	0.08875	0.035	0.0433
18	2.90725	3.086	3.08675	2.78775	2.43375	2.5465	2.45975	3.0475	1.862	2.359	2.4705	2.6535	3.34	3.52925	3.212	3.291	2.98075	1.87725	1.919	3.5655	0.0585	0.07125	0.04925	0.06675	0.011575	0.044	0.044	0.055	0.089	0.0365	0.043525
18.5	2.943	3.0895	3.0745	2.7385	2.41075	2.48	2.4315	3.02325	1.866	2.3855	2.48675	2.6415	3.255	3.41275	3.22275	3.302	3.0205	1.90925	1.923	3.5655	0.06025	0.07175	0.0495	0.07	0.025625	0.05325	0.05325	0.0505	0.09275	0.036	0.0435
19	2.9635	3.0935	3.06725	2.71925	2.39	2.47025	2.411	3.02175	1.87175	2.422	2.50175	2.6505	3.20875	3.31925	3.229	3.3275	3.02575	1.94875	1.93575	3.56825	0.06075	0.0725	0.047	0.0665	0.018525	0.0505	0.0505	0.0505	0.0935	0.0385	0.0388
19.5	2.9865	3.12425	3.044	2.697	2.41125	2.498	2.3815	3.00275	1.92075	2.47375	2.542	2.6385	3.199	3.29525	3.18225	3.331	3.04975	1.97275	1.964	3.557	0.06025	0.0695	0.04825	0.0655	0.021825	0.04675	0.04675	0.047	0.08825	0.037	0.043675
20	2.9815	3.111	2.983	2.687	2.4185	2.47575	2.391	3.00175	1.9335	2.4625	2.56675	2.63075	3.17475	3.26025	3.1815	3.3675	3.06725	1.973	1.907	3.5515	0.05925	0.06975	0.04825	0.06675	0.024425	0.0545	0.0545	0.04725	0.08075	0.03525	0.043925
20.5	2.99475	3.1085	2.98675	2.67675	2.43375	2.47625	2.371	2.968	1.9505	2.51475	2.596	2.635	3.17125	3.26575	3.19225	3.4115	3.095	1.95875	1.8985	3.52	0.05975	0.07125	0.04875	0.0665	0.020525	0.051	0.051	0.0445	0.08875	0.0345	0.0438
21	2.981	3.0855	2.956	2.666	2.43175	2.50575	2.3755	2.9725	1.95675	2.5445	2.639	2.6455	3.15925	3.24	3.186	3.4215	3.1215	1.9285	1.84925	3.4795	0.05975	0.07325	0.04925	0.06625	0.025325	0.0545	0.0545	0.04375	0.0935	0.0345	0.043675
21.5	2.96175	3.0645	2.92275	2.64875	2.4315	2.49525	2.37625	2.95225	1.98375	2.553	2.6375	2.63525	3.1505	3.24675	3.17025	3.3745	3.141	1.891	1.84975	3.482	0.06575	0.07425	0.04675	0.064	0.023775	0.0555	0.0555	0.0435	0.0965	0.03425	0.039825
22	2.96	3.02075	2.86775	2.6405	2.44875	2.492	2.39725	2.96275	1.983	2.58225	2.6525	2.6355	3.1305	3.24525	3.17575	3.34725	3.16925	1.84675	1.83875	3.51675	0.0665	0.0725	0.04925	0.06625	0.02575	0.0545	0.0545	0.04225	0.07875	0.0355	0.043975
22.5	2.92425	2.97725	2.854	2.6605	2.4655	2.50875	2.413	2.95425	2.0075	2.60725	2.6805	2.665	3.127	3.23675	3.1445	3.3335	3.19925	1.83	1.814	3.55175	0.0735	0.07325	0.04875	0.065	0.026425	0.057	0.057	0.04325	0.07575	0.02625	0.044
23	2.8915	2.9525	2.83	2.65	2.45975	2.509	2.41625	2.93	2.01825	2.59725	2.66275	2.65875	3.11725	3.2195	3.119	3.33575	3.158	1.80675	1.81975	3.54275	0.08425	0.07275	0.05025	0.06425	0.020275	0.057	0.057	0.04275	0.07425	0.03125	0.044725
23.5	2.883	2.9105	2.83175	2.646	2.47425	2.51075	2.42775	2.9295	2.03175	2.62475	2.665	2.6905	3.09625	3.2315	3.10575	3.32575	3.1395	1.783	1.84325	3.50375	0.098	0.075	0.0525	0.0625	0.024475	0.054	0.054	0.04225	0.0805	0.0345	0.0448
24	2.866	2.904	2.827	2.6585	2.4785	2.4975	2.44375	2.90875	2.04	2.6245	2.6695	2.71525	3.08475	3.21225	3.0755	3.3115	3.13825	1.77325	1.8275	3.497	0.1005	0.07475	0.0555	0.0615	0.025925	0.05525	0.05525	0.0415	0.07225	0.0315	0.044925
24.5	2.86225	2.87625	2.8255	2.65325	2.46775	2.509	2.44225	2.92325	2.052	2.642	2.685	2.71925	3.06325	3.218	3.0585	3.26975	3.12325	1.77575	1.84875	3.4905	0.122	0.0785	0.05925	0.0595	0.027375	0.058	0.058	0.05475	0.083	0.027	0.0448
25	2.823	2.85125	2.85675	2.6825	2.4615	2.53625	2.45925	2.90875	2.04875	2.6345	2.687	2.75575	3.04725	3.207	3.0595	3.21325	3.0935	1.78025	1.844	3.472	0.1635	0.079	0.0625	0.0635	0.026425	0.05175	0.05175	0.08075	0.076	0.02225	0.04565
25.5	2.79625	2.845	2.84975	2.684	2.45925	2.5535	2.4945	2.91525	2.068	2.6495	2.70725	2.79225	3.04375	3.19875	3.013	3.193	3.07525	1.81375	1.861	3.4115	0.214	0.0825	0.09175	0.067	0.026325	0.05075	0.05075	0.07475	0.08	0.02125	0.044875
26	2.793	2.8215	2.84975	2.69925	2.43475	2.572	2.50825	2.91375	2.08225	2.673	2.7255	2.79475	3.0235	3.221	3.024	3.11825	3.068	1.79425	1.8715	3.3935	0.2375	0.084	0.099	0.0715	0.02695	0.05025	0.05025	0.07325	0.081	0.019	0.04315
26.5	2.79425	2.8105	2.84575	2.68975	2.41225	2.5715	2.5255	2.8945	2.11375	2.68875	2.74425	2.8095	3.02925	3.2295	3.03525	3.122	3.06975	1.812	1.8945	3.3045	0.2765	0.08875	0.12575	0.082	0.0268	0.0535	0.0535	0.0675	0.07925	0.01975	0.042075
27	2.752	2.79375	2.85875	2.697	2.39125	2.5725	2.5305	2.89025	2.06875	2.7155	2.771	2.80125	3.00925	3.205	3.0025	3.05475	3.0425	1.819	1.94175	3.28325	0.36975	0.09825	0.15375	0.095	0.025425	0.05025	0.05025	0.06125	0.078	0.021	0.0457
27.5	2.7315	2.7895	2.88325	2.7025	2.36825	2.5735	2.51775	2.8645	2.109	2.7385	2.80525	2.84325	3.01075	3.19725	2.99975	3.0545	3.03275	1.83125	1.92825	3.27725	0.458	0.124	0.18875	0.11475	0.025625	0.04875	0.04875	0.06025	0.07175	0.0175	0.04585
28	2.72325	2.77425	2.8965	2.707	2.36275	2.56875	2.53175	2.85725	2.1255	2.72825	2.77875	2.83225	2.97975	3.182	2.9875	3.03625	3.0285	1.84825	1.94525	3.297	0.539	0.15275	0.24425	0.15075	0.0251	0.04475	0.04475	0.058	0.069	0.0125	0.0462
28.5	2.7115	2.7775	2.88675	2.70675	2.35675	2.58	2.55975	2.834	2.1635	2.7285	2.7935	2.86725	2.97325	3.182	2.96675	3.00775	3.0265	1.866	1.99875	3.2815	0.642	0.20375	0.305	0.17225	0.0246	0.048	0.048	0.057	0.06975	0	0.04645
29	2.67175	2.76125	2.8895	2.69875	2.354	2.54975	2.5665	2.78775	2.16475	2.7095	2.76425	2.845	2.97025	3.2035	2.977	3.005	3.01925	1.886	1.99675	3.24075	0.76	0.24925	0.44	0.2065	0.02265	0.04375	0.04375	0.059	0.0665	0	0.04185
29.5	2.65325	2.757	2.908	2.70275	2.3475	2.569	2.58125	2.77525	2.16475	2.715	2.7695	2.8575	2.9685	3.179	2.95425	2.996	3.0205	1.8955	2.0045	3.2055	0.92475	0.30725	0.53925	0.263	0.02405	0.03675	0.03675	0.05925	0.06475	0.0018	0.0464
30	2.61725	2.733	2.90325	2.6915	2.34875	2.53925	2.58575	2.74075	2.2145	2.6775	2.749	2.834	2.95125	3.14175	2.93275	2.98225	3.01675	1.91775	1.99325	3.18025	1.08975	0.3485	0.63375	0.346	0.02285	0.0275	0.0275	0.0585	0.06675	0.0155	0.0473
30.5	2.59025	2.71575	2.87675	2.686	2.343	2.54725	2.60075	2.715	2.23275	2.6665	2.7395	2.83325	2.95575	3.1565	2.9325	2.97675	3.01275	1.924	2.00875	3.176	1.2715	0.45075	0.7465	0.46025	0.02165	0.0585	0.0585	0.05575	0.06925	0.0155	0.04665
31	2.55575	2.7205	2.85425	2.6745	2.3325	2.54325	2.6105	2.68775	2.244	2.646	2.722	2.8035	2.942	3.1395	2.91825	2.956	2.99225	1.94175	2.022	3.1095	1.4645	0.60825	0.8945	0.58825	0.02335	0.03975	0.03975	0.05925	0.065	0.02	0.047425
31.5	2.5095	2.7045	2.83175	2.65375	2.3325	2.543	2.64575	2.67075	2.29475	2.63125	2.72375	2.79025	2.93975	3.12	2.905	2.9585	2.99175	1.95975	2.032	3.0945	1.61525	0.77175	1.08125	0.7385	0.01905	0.04625	0.04625	0.066	0.067	0.0185	0.046575
32	2.478	2.693	2.80325	2.62125	2.32525	2.53375	2.643	2.65725	2.29625	2.59775	2.688	2.75125	2.93875	3.116	2.901	2.953	2.99875	1.99575	2.017	3.09975	1.74375	0.9345	1.2645	0.909	0.022025	0.0575	0.0575	0.06875	0.06675	0.019	0.046025
32.5	2.42875	2.667	2.7565	2.5835	2.32875	2.517	2.647	2.62725	2.35775	2.61625	2.70275	2.7555	2.9345	3.101	2.89	2.9455	2.9945	2.01225	2.046	3.07775	1.8615	1.133	1.45525	1.1535	0.018875	0.04275	0.04275	0.07875	0.0625	0.021	0.0467
33	2.39575	2.64325	2.7175	2.5495	2.3305	2.507	2.64875	2.6005	2.387	2.5995	2.69025	2.71875	2.92125	3.092	2.88375	2.92825	2.992	2.038	2.012	3.04675	1.967	1.40075	1.6195	1.33725	0.016725	0.04825	0.04825	0.06425	0.0645	0.019	0.047175
33.5	2.37325	2.62925	2.67025	2.50425	2.32225	2.49	2.664	2.60325	2.41325	2.57975	2.68225	2.6945	2.91525	3.07375	2.8795	2.919	2.985	2.056	2.01575	3.04	2.0895	1.61475	1.79825	1.52175	0.0169	0.026	0.026	0.06525	0.062	0.0185	0.047375
34	2.33175	2.593	2.63175	2.4885	2.31825	2.47725	2.661	2.56775	2.431	2.57375	2.682	2.68275	2.91125	3.0665	2.867	2.9165	2.9905	2.071	2.017	3.033	2.18425	1.78675	1.94175	1.6745	0.015775	0.0535	0.0535	0.06775	0.06025	0.017	0.047025
34.5	2.3045	2.56425	2.58925	2.47225	2.31175	2.4775	2.64525	2.5505	2.45025	2.56475	2.67425	2.666	2.91375	3.0505	2.85825	2.91425	2.996	2.10575	2.05825	3.01825	2.257	1.992	2.0635	1.83125	0.0237	0.0395	0.0395	0.06475	0.054	0.01875	0.04735
35	2.2795	2.5405	2.553	2.42775	2.31125	2.4965	2.644	2.54025	2.44975	2.56325	2.664	2.65325	2.90675	3.061	2.8585	2.90325	2.9775	2.11725	2.03575	3.00475	2.31525	2.1235	2.1685	1.9425	0.023375	0.02875	0.02875	0.06125	0.058	0.0195	0.04715
35.5	2.25125	2.50775	2.5245	2.41525	2.306	2.48525	2.592	2.5205	2.4495	2.5445	2.655	2.64225	2.901	3.04975	2.85075	2.89525	2.9915	2.12925	2.0515	3.00225	2.36025	2.25275	2.2575	2.058	0.021725	0.046	0.046	0.056	0.059	0.0185	0.047525
36	2.22875	2.48975	2.50025	2.401	2.30975	2.47775	2.58125	2.51	2.4895	2.55125	2.64525	2.628	2.89625	3.033	2.8315	2.89575	2.98025	2.162	2.11275	2.99825	2.39625	2.32975	2.34575	2.15075	0.025325	0.0475	0.0475	0.064	0.05375	0.0205	0.04715
36.5	2.204	2.461	2.4735	2.37125	2.306	2.4665	2.5535	2.49825	2.4935	2.52975	2.631	2.61975	2.89075	3.03525	2.83325	2.8835	2.99525	2.16775	2.11575	2.98525	2.4355	2.4265	2.4095	2.21525	0.024025	0.046	0.046	0.065	0.05475	0.017	0.047025
37	2.181	2.4325	2.44525	2.34375	2.31275	2.449	2.5575	2.483	2.472	2.526	2.62	2.595	2.883	3.03275	2.82875	2.88	2.985	2.18225	2.12275	2.9995	2.449	2.5165	2.47125	2.2665	0.02495	0.05025	0.05025	0.062	0.055	0.0105	0.04805
37.5	2.1645	2.4225	2.4265	2.307	2.31325	2.43525	2.52125	2.473	2.45575	2.52175	2.60925	2.584	2.884	3.02825	2.816	2.86975	2.9745	2.19575	2.111	2.9815	2.4675	2.552	2.53075	2.3265	0.024275	0.04225	0.04225	0.06125	0.05275	0.00525	0.047925
38	2.14775	2.4115	2.40625	2.3015	2.31375	2.425	2.499	2.45725	2.4725	2.5175	2.603	2.58525	2.87775	3.02425	2.818	2.88375	2.97125	2.21125	2.12325	2.98975	2.4645	2.60525	2.59325	2.38825	0.023475	0.04975	0.04975	0.06025	0.053	0.00645	0.0484
38.5	2.1305	2.39525	2.38925	2.285	2.30725	2.4225	2.4825	2.46025	2.45125	2.51225	2.61375	2.56475	2.87625	3.01125	2.805	2.861	2.98525	2.22325	2.1105	2.9805	2.4585	2.63725	2.6475	2.41975	0.0251	0.03875	0.03875	0.06125	0.04975	0.0125	0.04865
39	2.1145	2.4	2.37375	2.264	2.31375	2.40375	2.4565	2.44875	2.415	2.50275	2.595	2.55575	2.87625	3.0185	2.80275	2.87275	2.981	2.2525	2.13	2.99625	2.451	2.65775	2.6815	2.44175	0.022375	0.03275	0.03275	0.05875	0.0485	0.02275	0.047875
39.5	2.0985	2.38025	2.35	2.2535	2.30925	2.39725	2.45325	2.44525	2.43525	2.50975	2.6035	2.5525	2.87175	2.99075	2.78275	2.8555	2.9925	2.2605	2.15675	2.9835	2.4295	2.6435	2.715	2.46	0.0191	0.04725	0.04725	0.05975	0.048	0.02175	0.044975
40	2.07925	2.36625	2.342	2.2485	2.31075	2.3825	2.42775	2.43375	2.442	2.492	2.58225	2.5355	2.862	2.98675	2.7835	2.85325	2.98825	2.272	2.11325	2.9825	2.41825	2.62975	2.74475	2.455	0.02255	0.05275	0.05275	0.05925	0.0505	0.0195	0.047625
40.5	2.0645	2.383	2.3295	2.23025	2.3135	2.37175	2.403	2.41375	2.431	2.4975	2.56925	2.51725	2.85225	2.98575	2.7715	2.8565	3.01775	2.268	2.1415	2.9755	2.39975	2.59625	2.7665	2.4665	0.025	0.01325	0.01325	0.05675	0.04925	0.02	0.0482
41	2.05625	2.376	2.31825	2.226	2.30825	2.363	2.38725	2.42	2.43125	2.4885	2.569	2.50925	2.862	2.985	2.7715	2.8505	3.01875	2.30525	2.175	2.9845	2.384	2.54025	2.806	2.45325	0.025225	0.03275	0.03275	0.054	0.04675	0.02325	0.0493
41.5	2.04625	2.3635	2.2985	2.2115	2.2995	2.355	2.388	2.45225	2.4095	2.4785	2.51725	2.462	2.851	2.97625	2.7665	2.8355	3.00725	2.336	2.184	2.9725	2.3825	2.50775	2.81125	2.43325	0.0253	0.04075	0.04075	0.0555	0.045	0.026	0.04615
42	2.03725	2.36575	2.2945	2.1895	2.2995	2.34425	2.358	2.409	2.39725	2.485	2.52525	2.48575	2.84275	2.96475	2.75225	2.835	2.98	2.35275	2.235	2.97525	2.39175	2.47875	2.83525	2.4385	0.02565	0.03975	0.03975	0.05775	0.04825	0.02475	0.04885
42.5	2.02975	2.36625	2.2855	2.1815	2.289	2.332	2.35475	2.39375	2.38775	2.4735	2.52125	2.4765	2.837	2.95375	2.7425	2.83925	2.998	2.38125	2.294	2.9725	2.395	2.455	2.85125	2.442	0.0243	0.031	0.031	0.055	0.048	0.025	0.0492
43	2.0205	2.3715	2.27475	2.185	2.29325	2.33075	2.34825	2.3945	2.3855	2.4825	2.5125	2.46125	2.8285	2.9455	2.73775	2.8465	2.99775	2.3995	2.2765	2.96925	2.40275	2.45625	2.85275	2.45075	0.023575	0.038	0.038	0.0505	0.047	0.0255	0.049275
43.5	2.02025	2.388	2.26575	2.16775	2.28775	2.33825	2.34975	2.424	2.37575	2.4515	2.47875	2.44525	2.829	2.9525	2.741	2.861	3.01075	2.38625	2.32375	2.95625	2.43325	2.4965	2.8105	2.4275	0.02515	0.044	0.044	0.0505	0.041	0.02625	0.0474
44	2.01175	2.374	2.25275	2.15725	2.28975	2.32925	2.33575	2.41525	2.38375	2.449	2.4665	2.4345	2.81775	2.93325	2.71475	2.859	3.0085	2.43525	2.343	2.97125	2.43575	2.51675	2.79225	2.44525	0.02385	0.046	0.046	0.047	0.047	0.02575	0.046975
44.5	2.01575	2.38775	2.244	2.159	2.27875	2.31375	2.30875	2.36475	2.38775	2.46225	2.47125	2.44125	2.813	2.932	2.7135	2.85875	3.0205	2.462	2.35575	2.96625	2.4545	2.52825	2.7725	2.475	0.025875	0.04325	0.04325	0.04725	0.05	0.02375	0.0472
45	2.017	2.38725	2.24175	2.15	2.263	2.33	2.3225	2.39325	2.39075	2.441	2.455	2.428	2.8035	2.9315	2.7115	2.85475	3.01625	2.44925	2.38275	2.9735	2.46925	2.54375	2.762	2.5075	0.02525	0.04325	0.04325	0.0445	0.0455	0.02325	0.04705
45.5	2.015	2.383	2.23625	2.148	2.257	2.31275	2.292	2.34	2.3985	2.4515	2.4625	2.45175	2.80125	2.935	2.714	2.86475	3.01575	2.446	2.381	2.957	2.489	2.56225	2.7395	2.54625	0.023775	0.034	0.034	0.04375	0.04275	0.02575	0.0496
46	2.013	2.38775	2.238	2.1435	2.251	2.312	2.30425	2.34025	2.39925	2.45575	2.45875	2.4355	2.78675	2.92075	2.703	2.84425	3.00625	2.43575	2.3685	2.9685	2.5215	2.56675	2.71075	2.5645	0.02355	0.0455	0.0455	0.0435	0.0445	0.01675	0.049775
46.5	2.00725	2.38425	2.22825	2.13975	2.24825	2.31	2.2935	2.33425	2.403	2.44725	2.44775	2.443	2.78425	2.91025	2.68825	2.8565	3.01925	2.44475	2.37175	2.96925	2.53775	2.60225	2.70825	2.5775	0.024575	0.03575	0.03575	0.04225	0.0425	0.0185	0.050975
47	2.0035	2.386	2.2365	2.13875	2.23925	2.31375	2.28475	2.32525	2.4115	2.44275	2.432	2.43425	2.77475	2.89425	2.68	2.824	3.00775	2.43675	2.37	2.9685	2.52775	2.61925	2.6915	2.607	0.03825	0.044	0.044	0.04325	0.044	0.012	0.050525
47.5	2.008	2.39025	2.216	2.1395	2.2305	2.30675	2.28675	2.322	2.4115	2.45125	2.415	2.42675	2.766	2.89	2.6675	2.8345	2.99875	2.40925	2.36075	2.978	2.5365	2.6585	2.67725	2.62475	0.025275	0.0445	0.0445	0.04275	0.04325	0.008725	0.0504
48	2.00675	2.38675	2.2205	2.14525	2.22525	2.31325	2.2805	2.32225	2.4115	2.43375	2.424	2.448	2.75575	2.87275	2.6625	2.82725	3.00225	2.42875	2.35825	2.9625	2.56875	2.6835	2.66425	2.65375	0.026025	0.049	0.049	0.04225	0.044	0.0085	0.051125

## Sheet: Figure 2c-e
Ammonia (M)	Lag t				Td				OD600 at t=48 h
0 (PC)	0	0	0	0	1.06416	1.10961	1.15064	1.03397	2	2.398	2.23	2.145
0.01	0	0	0	0	1.0975	1.24193	1.16812	1.07417	2.225	2.313	2.281	2.322
0.025	1.6	1.1	0.6	0.7	1.32632	1.25049	1.26561	1.31507	2.412	2.434	2.424	2.448
0.05	1.6	1.9	2.1	1.4	1.23346	1.55673	1.38784	1.38784	2.682	2.873	2.663	2.827
0.1	4.5	8.1	6.5	5.4	1.56774	1.46378	1.68206	1.37076	2.766	2.429	2.358	2.763
0.25	23.7	27.1	24.7	27.1	1.6454	1.44485	1.4537	1.66763	2.552	2.369	2.664	2.65375
0.5									0.026	0.044	0.049	0.04225
1									0.044	0.009	0.088	0.051

## Sheet: Figure 2e&f
	0.1 M ammonia						0.25 M ammonia
Time (h)	Ammonia (M)			Cell viability (CFU/mL)			Ammonia (M)			Cell viability (CFU/mL)
0	0.1	0.095	0.0997	277000000	278000000	308000000	0.252738	0.242159	0.242928	56300000	71300000	41300000
4	0.055395	0.057029	0.048855	33800	11900	59400	0.098095	0.107135	0.119445	19100	12600	15400
8	0.018234	0.045874	0.019042	315000	1740000	1040000	0.061261	0.064435	0.066743	16800	13800	34700
16							0.049336	0.040969	0.04068	675000	681000	525000

## Sheet: Figure 3a
pH	Cell viability (CFU/mL)
6.05 (PC)	14800000000000	16400000000000	16300000000000
8.05	12300000000000	19800000000000	17400000000000
8.96	43300000000000	29800000000000	21300000000000
9.38	16900000000000	16300000000000	23300000000000
9.73	7670000000000	13300000000000	11300000000000
10.18	59300000000000	24000000000000	42800000000000
10.49	35400000000000	33400000000000	11900000000000
10.78	5750000000000	2760000000000	6500000000000

## Sheet: Figure 3b
Time (h)	pH 6.05 (PC)				pH 8.05				pH 8.96				pH 9.38				pH 9.73				pH 10.18				pH 10.49				pH 10.78
0	0.056	0.1015	0.06025	0.0365	0.066	0.0515	0.06175	0.059	0.06575	0.05075	0.0595	0.052	0.0625	0.05075	0.05425	0.072	0.06225	0.0505	0.05225	0.0785	0.057	0.06625	0.04925	0.05425	0.05625	0.0635	0.05525	0.054	0.05825	0.04925	0.035	0.05225
0.5	0.06175	0.127	0.06175	0.034	0.114	0.074	0.08425	0.073	0.081	0.0885	0.058	0.1235	0.0975	0.0885	0.07425	0.1035	0.06875	0.0725	0.07175	0.116	0.074	0.08275	0.069	0.0755	0.07025	0.068	0.068	0.0655	0.0845	0.064	0.06375	0.07525
1	0.06925	0.14325	0.0725	0.03625	0.149	0.09375	0.13525	0.096	0.128	0.10575	0.10225	0.171	0.1285	0.10575	0.095	0.15225	0.116	0.099	0.09925	0.117	0.10275	0.103	0.10825	0.08975	0.10425	0.08825	0.074	0.059	0.10825	0.071	0.07	0.0885
1.5	0.08775	0.16475	0.082	0.0485	0.1695	0.11725	0.1455	0.13825	0.1885	0.12475	0.15525	0.207	0.1765	0.12475	0.1405	0.202	0.182	0.1285	0.1495	0.1585	0.138	0.12575	0.14125	0.107	0.143	0.11775	0.08975	0.07725	0.145	0.077	0.077	0.0895
2	0.10425	0.195	0.1075	0.05725	0.2175	0.1605	0.19575	0.195	0.24075	0.17075	0.2195	0.2545	0.24025	0.17075	0.199	0.279	0.2135	0.164	0.20725	0.20825	0.1635	0.1475	0.16875	0.14225	0.1935	0.147	0.1085	0.088	0.18	0.0875	0.08075	0.09575
2.5	0.116	0.22275	0.1525	0.09475	0.301	0.235	0.27575	0.2715	0.34825	0.2665	0.30225	0.30425	0.3425	0.2665	0.27275	0.39225	0.296	0.213	0.26875	0.26225	0.195	0.183	0.21175	0.2245	0.215	0.1715	0.146	0.133	0.24075	0.10425	0.10175	0.11225
3	0.12925	0.26675	0.184	0.12425	0.39525	0.3595	0.41175	0.38375	0.47325	0.38925	0.41	0.449	0.45675	0.38925	0.40525	0.5075	0.41875	0.2905	0.3635	0.37975	0.2255	0.22675	0.2675	0.25925	0.2545	0.19	0.2115	0.1805	0.1915	0.11375	0.13425	0.14025
3.5	0.1505	0.36575	0.237	0.1645	0.55525	0.51425	0.51225	0.48775	0.63875	0.541	0.5255	0.57975	0.626	0.541	0.55325	0.71375	0.58175	0.3845	0.48975	0.505	0.266	0.29425	0.34825	0.3205	0.315	0.22475	0.26825	0.259	0.24225	0.15075	0.185	0.16925
4	0.19925	0.469	0.32475	0.22925	0.75225	0.686	0.72025	0.679	0.8	0.76	0.752	0.7685	0.84375	0.76	0.76275	0.92025	0.80875	0.52775	0.689	0.6995	0.3325	0.39575	0.4575	0.42975	0.43775	0.2705	0.33075	0.303	0.332	0.183	0.24925	0.24
4.5	0.26275	0.685	0.435	0.38275	0.9395	0.89325	0.9335	0.922	0.988	0.9625	0.9305	1.0145	0.9965	0.9625	0.965	1.08425	0.971	0.73575	0.9185	0.91275	0.4085	0.5225	0.56225	0.5405	0.64625	0.33525	0.4085	0.39475	0.41325	0.225	0.321	0.2715
5	0.36875	0.9025	0.64825	0.63275	1.15025	1.081	1.1385	1.1315	1.1895	1.1415	1.095	1.17775	1.17175	1.1415	1.135	1.2435	1.15725	0.92275	1.121	1.1245	0.49275	0.6715	0.79475	0.8055	0.88175	0.40625	0.48975	0.5155	0.47575	0.277	0.4065	0.33625
5.5	0.52825	1.10975	0.88475	0.875	1.32375	1.2465	1.29775	1.33025	1.35775	1.31075	1.26725	1.34825	1.33675	1.31075	1.302	1.4045	1.33575	1.11025	1.303	1.325	0.59075	0.85925	1.05425	1.04175	1.079	0.53625	0.71175	0.741	0.59875	0.337	0.5085	0.4365
6	0.7325	1.30625	1.08425	1.085	1.47225	1.41275	1.455	1.50825	1.519	1.46825	1.4205	1.5135	1.48525	1.46825	1.434	1.56075	1.4845	1.28425	1.462	1.48975	0.6885	1.0125	1.278	1.263	1.2515	0.71775	0.9905	0.91675	0.76375	0.417	0.63525	0.547
6.5	0.98975	1.48875	1.30875	1.30425	1.5735	1.54175	1.576	1.638	1.63825	1.606	1.55675	1.64575	1.62375	1.606	1.57525	1.6855	1.612	1.4645	1.59675	1.625	0.791	1.14625	1.465	1.459	1.4005	0.88125	1.17675	1.09425	0.9455	0.6025	0.78275	0.73475
7	1.1955	1.63125	1.4995	1.4905	1.69475	1.68825	1.692	1.75	1.7465	1.73125	1.67675	1.76	1.73625	1.73125	1.68325	1.792	1.73575	1.60525	1.725	1.7455	0.90525	1.26975	1.61825	1.6115	1.53375	1.02575	1.32825	1.32425	1.148	0.7495	0.973	1.05
7.5	1.361	1.771	1.66875	1.6355	1.77375	1.803	1.797	1.8585	1.8455	1.82875	1.788	1.86925	1.845	1.82875	1.79675	1.89625	1.8405	1.73775	1.84	1.86075	1.018	1.3765	1.75125	1.74775	1.66175	1.14775	1.49525	1.51525	1.31875	0.86925	1.1295	1.28625
8	1.5205	1.88975	1.8095	1.7765	1.873	1.9215	1.9	1.94575	1.9495	1.935	1.88175	1.9615	1.93325	1.935	1.90175	1.98775	1.922	1.8515	1.938	1.96225	1.14525	1.4715	1.871	1.86975	1.75275	1.25925	1.64425	1.6705	1.46725	0.976	1.28675	1.47625
8.5	1.65025	2.01	1.93625	1.907	1.96525	2.03775	1.99675	2.02325	2.0175	2.002	1.974	2.04575	2.011	2.002	1.998	2.05975	1.99825	1.936	2.052	2.045	1.2615	1.552	1.98525	1.9755	1.83675	1.35725	1.7795	1.8025	1.6005	1.10175	1.41525	1.6315
9	1.76375	2.0925	2.05625	2.0165	2.06	2.13725	2.0795	2.08675	2.091	2.065	2.06425	2.1245	2.096	2.065	2.06025	2.12675	2.0655	1.99125	2.13025	2.11025	1.35625	1.61525	2.06875	2.06625	1.90775	1.44375	1.89625	1.91925	1.703	1.211	1.52225	1.7725
9.5	1.884	2.174	2.1525	2.1	2.14625	2.22475	2.15475	2.14225	2.15825	2.12025	2.13725	2.1965	2.178	2.12025	2.13975	2.143	2.12975	2.03075	2.203	2.16375	1.44825	1.6535	2.142	2.14775	1.95825	1.52925	1.99625	2.01775	1.7905	1.29225	1.62325	1.8995
10	1.997	2.23825	2.2405	2.195	2.226	2.29425	2.24375	2.193	2.219	2.165	2.2155	2.2365	2.24375	2.165	2.18725	2.15275	2.1685	2.058	2.27	2.20275	1.542	1.6825	2.22525	2.19525	1.99025	1.59125	2.10125	2.09825	1.85225	1.3685	1.7075	1.998
10.5	2.09825	2.292	2.32025	2.28425	2.29275	2.3645	2.32075	2.24225	2.27675	2.19275	2.27525	2.28675	2.32	2.19275	2.21775	2.151	2.20925	2.07275	2.3205	2.228	1.61475	1.6915	2.27475	2.2405	1.998	1.637	2.18275	2.15675	1.90225	1.44775	1.78525	2.075
11	2.18725	2.35025	2.378	2.36525	2.3655	2.446	2.4125	2.3075	2.32575	2.21275	2.33075	2.31175	2.3825	2.21275	2.2565	2.13525	2.25425	2.0605	2.372	2.237	1.65625	1.69275	2.32225	2.272	1.99125	1.6765	2.2445	2.20025	1.9395	1.49175	1.84375	2.1225
11.5	2.28225	2.40725	2.45725	2.4205	2.42625	2.4775	2.47775	2.361	2.3755	2.2275	2.38225	2.31	2.441	2.2275	2.2735	2.11875	2.26725	2.06625	2.40875	2.23525	1.681	1.68825	2.3525	2.27775	1.975	1.687	2.2895	2.222	1.96825	1.5205	1.9045	2.141
12	2.36175	2.4565	2.5175	2.501	2.4905	2.52225	2.54725	2.426	2.407	2.20875	2.426	2.33025	2.47525	2.20875	2.28575	2.09375	2.29025	2.069	2.434	2.23725	1.6935	1.6965	2.388	2.284	1.9385	1.68025	2.34375	2.233	1.9845	1.5535	1.9635	2.1615
12.5	2.45925	2.523	2.587	2.556	2.548	2.54475	2.6095	2.4705	2.45025	2.18425	2.45075	2.32475	2.50425	2.18425	2.26025	2.06625	2.30125	2.02775	2.43875	2.22425	1.6905	1.69925	2.40975	2.28225	1.8975	1.67175	2.36125	2.22075	1.993	1.57375	2.00025	2.16775
13	2.52825	2.59725	2.666	2.622	2.59425	2.55025	2.65725	2.5165	2.47575	2.1715	2.47475	2.298	2.5125	2.1715	2.2515	2.0195	2.2985	2.03025	2.44975	2.214	1.69025	1.68975	2.412	2.256	1.8645	1.651	2.366	2.2145	1.95775	1.572	2.03925	2.1395
13.5	2.59225	2.661	2.727	2.69175	2.63525	2.5545	2.6715	2.545	2.49475	2.158	2.475	2.27125	2.518	2.158	2.215	1.99575	2.2855	2.0085	2.444	2.18175	1.6745	1.687	2.418	2.2115	1.83825	1.62575	2.37225	2.179	1.98675	1.57325	2.082	2.1235
14	2.6615	2.71725	2.79725	2.73275	2.6785	2.5405	2.718	2.58675	2.49775	2.13975	2.466	2.21875	2.51875	2.13975	2.17525	1.97475	2.25925	2.00775	2.4295	2.16725	1.6635	1.677	2.42325	2.18	1.85875	1.60875	2.363	2.1535	1.98175	1.5805	2.105	2.09625
14.5	2.7085	2.7745	2.843	2.7805	2.711	2.5295	2.72825	2.61425	2.5045	2.12	2.44975	2.17925	2.50625	2.12	2.14425	1.95	2.244	2.0075	2.42925	2.1365	1.6545	1.6795	2.41775	2.15325	1.84525	1.607	2.34225	2.14325	1.98	1.575	2.12775	2.079
15	2.7605	2.831	2.89775	2.79525	2.72725	2.50975	2.755	2.6305	2.502	2.089	2.414	2.14075	2.4725	2.089	2.10775	1.947	2.22575	1.9835	2.39825	2.1225	1.66075	1.66175	2.40875	2.12975	1.83775	1.58975	2.326	2.11	2.002	1.5705	2.13475	2.05675
15.5	2.80575	2.89175	2.94425	2.801	2.75975	2.513	2.78	2.6385	2.488	2.0835	2.38025	2.1175	2.45775	2.0835	2.1145	1.94375	2.2225	1.96525	2.39525	2.0915	1.6475	1.67075	2.41675	2.10925	1.849	1.588	2.2985	2.08675	1.999	1.581	2.14325	2.02925
16	2.832	2.92725	2.99175	2.8185	2.771	2.4715	2.809	2.63175	2.456	2.07425	2.356	2.10325	2.42375	2.07425	2.1025	1.96425	2.199	1.95025	2.38275	2.085	1.661	1.67875	2.41975	2.09425	1.854	1.581	2.293	2.0815	1.99125	1.57075	2.15625	2.02125
16.5	2.85975	2.9845	3.01775	2.82475	2.7875	2.463	2.80625	2.6135	2.422	2.07475	2.3435	2.0945	2.399	2.07475	2.1015	1.95825	2.21125	1.92325	2.376	2.0805	1.65625	1.6815	2.41675	2.09425	1.87075	1.589	2.28	2.07275	1.98	1.56025	2.1655	2.02075
17	2.88225	3.03775	3.04375	2.80775	2.79975	2.449	2.8125	2.6035	2.39225	2.08225	2.3105	2.081	2.38825	2.08225	2.10925	1.98725	2.20725	1.92375	2.362	2.08025	1.6495	1.681	2.39825	2.0825	1.87675	1.5925	2.269	2.06275	1.9655	1.55425	2.144	2.013
17.5	2.89625	3.0495	3.05575	2.796	2.78075	2.47825	2.8105	2.58	2.36675	2.099	2.312	2.0855	2.37925	2.099	2.1195	1.99725	2.21775	1.91525	2.366	2.066	1.63875	1.68375	2.4095	2.092	1.87525	1.6045	2.2765	2.06725	1.9605	1.56675	2.12275	2.015
18	2.90725	3.086	3.08675	2.78775	2.758	2.4745	2.811	2.58025	2.3635	2.10775	2.32	2.08225	2.36825	2.10775	2.1305	2.01875	2.2095	1.93	2.37375	2.10025	1.63225	1.67525	2.38675	2.10525	1.88825	1.60675	2.274	2.08175	1.973	1.55825	2.145	2.02875
18.5	2.943	3.0895	3.0745	2.7385	2.732	2.50225	2.7885	2.56775	2.35225	2.118	2.316	2.1105	2.37125	2.118	2.15825	2.03225	2.21875	1.93	2.37875	2.09325	1.63625	1.685	2.3875	2.1125	1.89875	1.619	2.283	2.0795	1.961	1.57025	2.15125	2.0445
19	2.9635	3.0935	3.06725	2.71925	2.67075	2.5125	2.76825	2.56775	2.33925	2.15275	2.3195	2.118	2.36875	2.15275	2.17275	2.05975	2.22425	1.9335	2.36675	2.1035	1.63225	1.66325	2.36325	2.11925	1.91225	1.61575	2.26525	2.09725	1.97675	1.57275	2.13525	2.0475
19.5	2.9865	3.12425	3.044	2.697	2.6205	2.55225	2.76475	2.56925	2.35125	2.172	2.33925	2.11875	2.37775	2.172	2.20925	2.10425	2.22275	1.9345	2.37	2.1255	1.62475	1.6625	2.3395	2.147	1.932	1.615	2.25275	2.1185	1.98475	1.5635	2.1225	2.0735
20	2.9815	3.111	2.983	2.687	2.58325	2.56925	2.75125	2.554	2.346	2.18875	2.35275	2.14225	2.37675	2.18875	2.1995	2.11325	2.25525	1.94525	2.3915	2.08375	1.611	1.65925	2.32825	2.13225	1.938	1.6245	2.25825	2.11525	1.9905	1.5755	2.12025	2.07325
20.5	2.99475	3.1085	2.98675	2.67675	2.56	2.587	2.756	2.57	2.35925	2.195	2.3655	2.1615	2.383	2.195	2.22725	2.12925	2.25375	1.9465	2.4015	2.142	1.6005	1.658	2.3285	2.14575	1.941	1.624	2.25725	2.1245	1.991	1.57375	2.1075	2.09975
21	2.981	3.0855	2.956	2.666	2.54625	2.619	2.74525	2.56475	2.35525	2.21425	2.38425	2.191	2.391	2.21425	2.2495	2.1305	2.25725	1.9565	2.38425	2.12325	1.5665	1.664	2.30275	2.1395	1.95425	1.62575	2.24325	2.1125	1.994	1.58575	2.0845	2.0915
21.5	2.96175	3.0645	2.92275	2.64875	2.53525	2.6315	2.74925	2.568	2.373	2.21375	2.3985	2.20725	2.39525	2.21375	2.257	2.1335	2.271	1.96625	2.39825	2.16875	1.5235	1.662	2.2955	2.159	1.9595	1.628	2.23275	2.119	2.01	1.57825	2.07525	2.11125
22	2.96	3.02075	2.86775	2.6405	2.5365	2.635	2.75725	2.55925	2.385	2.2375	2.40975	2.2245	2.41275	2.2375	2.282	2.14475	2.29525	1.98	2.406	2.1755	1.45775	1.67775	2.309	2.143	1.96525	1.62125	2.2395	2.123	2.00325	1.5825	2.062	2.0905
22.5	2.92425	2.97725	2.854	2.6605	2.52625	2.654	2.7475	2.5825	2.38725	2.26425	2.436	2.259	2.40375	2.26425	2.2805	2.15125	2.291	1.9925	2.411	2.201	1.4575	1.69675	2.3055	2.13	1.98925	1.6205	2.228	2.12375	2.005	1.5795	2.061	2.0945
23	2.8915	2.9525	2.83	2.65	2.5255	2.6585	2.742	2.58075	2.39525	2.25525	2.44775	2.27325	2.415	2.25525	2.29375	2.1605	2.31775	1.999	2.43	2.20975	1.46875	1.70225	2.303	2.13075	1.97925	1.618	2.23675	2.13475	1.9875	1.57	2.03625	2.10575
23.5	2.883	2.9105	2.83175	2.646	2.54225	2.67725	2.77075	2.5675	2.41975	2.2375	2.46825	2.27325	2.429	2.2375	2.295	2.16	2.3335	2.00775	2.43575	2.226	1.44975	1.6985	2.30525	2.1085	1.99525	1.61925	2.2395	2.10925	1.975	1.5785	2.01575	2.09575
24	2.866	2.904	2.827	2.6585	2.54475	2.67225	2.77025	2.586	2.4445	2.22875	2.47475	2.30375	2.448	2.22875	2.30525	2.16475	2.33975	2.01775	2.46325	2.26575	1.4175	1.718	2.296	2.1165	1.99625	1.60925	2.217	2.10125	1.99025	1.5555	1.9905	2.10625
24.5	2.86225	2.87625	2.8255	2.65325	2.55325	2.68575	2.746	2.5915	2.45675	2.224	2.48575	2.3015	2.45575	2.224	2.30825	2.18425	2.3385	2.02275	2.4625	2.273	1.417	1.73	2.2975	2.114	1.99575	1.6125	2.21175	2.08775	1.949	1.56675	1.97325	2.08925
25	2.823	2.85125	2.85675	2.6825	2.5415	2.69025	2.741	2.59775	2.46275	2.233	2.5205	2.3195	2.457	2.233	2.33325	2.1995	2.34925	2.048	2.467	2.29625	1.38275	1.7705	2.29825	2.11775	2.00075	1.6005	2.22525	2.0965	1.94525	1.56475	1.957	2.0915
25.5	2.79625	2.845	2.84975	2.684	2.56075	2.6985	2.6945	2.6095	2.47875	2.2345	2.518	2.34025	2.46825	2.2345	2.35125	2.203	2.356	2.08775	2.494	2.319	1.37125	1.8035	2.3075	2.1075	2.03375	1.61275	2.2325	2.081	1.91975	1.56225	1.942	2.083
26	2.793	2.8215	2.84975	2.69925	2.56775	2.697	2.656	2.627	2.483	2.25	2.537	2.352	2.48575	2.25	2.34425	2.205	2.37325	2.12975	2.49	2.337	1.38675	1.84575	2.31325	2.11425	2.01675	1.61575	2.23825	2.082	1.876	1.56	1.928	2.0605
26.5	2.79425	2.8105	2.84575	2.68975	2.59275	2.75725	2.629	2.65325	2.493	2.2655	2.5565	2.35425	2.49	2.2655	2.3545	2.2225	2.3625	2.16275	2.48575	2.31	1.41125	1.87525	2.29375	2.12875	2.03025	1.60025	2.232	2.087	1.86925	1.55075	1.9235	2.065
27	2.752	2.79375	2.85875	2.697	2.59525	2.71625	2.61	2.65675	2.48825	2.27425	2.574	2.34225	2.4905	2.27425	2.38	2.2315	2.37175	2.175	2.4825	2.345	1.4085	1.90225	2.27775	2.14875	2.0055	1.604	2.2045	2.07125	1.8495	1.54625	1.9135	2.06575
27.5	2.7315	2.7895	2.88325	2.7025	2.60075	2.6685	2.5755	2.65825	2.50025	2.26675	2.5805	2.3535	2.5025	2.26675	2.393	2.22625	2.38125	2.16775	2.4895	2.3595	1.4225	1.91975	2.25425	2.147	1.943	1.59975	2.18675	2.09125	1.856	1.544	1.90575	2.072
28	2.72325	2.77425	2.8965	2.707	2.6225	2.634	2.54525	2.642	2.49775	2.289	2.5745	2.37325	2.51525	2.289	2.4025	2.229	2.38	2.16975	2.46375	2.386	1.43075	1.9195	2.23975	2.151	1.9145	1.60025	2.1655	2.08575	1.8485	1.5465	1.89475	2.07075
28.5	2.7115	2.7775	2.88675	2.70675	2.632	2.608	2.51725	2.641	2.51975	2.29525	2.58075	2.3835	2.5245	2.29525	2.39225	2.25375	2.39125	2.16775	2.444	2.37725	1.447	1.92375	2.212	2.147	1.8925	1.58725	2.1395	2.0915	1.82525	1.538	1.886	2.07825
29	2.67175	2.76125	2.8895	2.69875	2.65225	2.5925	2.49225	2.6405	2.51375	2.3025	2.56875	2.379	2.5445	2.3025	2.36925	2.2495	2.40125	2.159	2.42375	2.38	1.447	1.9135	2.20625	2.15975	1.87675	1.57075	2.124	2.11825	1.8125	1.537	1.885	2.073
29.5	2.65325	2.757	2.908	2.70275	2.69825	2.56025	2.47325	2.633	2.5395	2.29825	2.56775	2.413	2.56225	2.29825	2.3405	2.27975	2.409	2.147	2.4305	2.40825	1.46425	1.907	2.18925	2.1395	1.87175	1.5575	2.0915	2.1305	1.806	1.5305	1.8785	2.09625
30	2.61725	2.733	2.90325	2.6915	2.6625	2.5025	2.46325	2.647	2.549	2.264	2.52775	2.42275	2.5775	2.264	2.31025	2.2855	2.41875	2.1265	2.3885	2.42375	1.4785	1.89575	2.1665	2.15225	1.8625	1.55625	2.07225	2.1185	1.78925	1.537	1.8725	2.08
30.5	2.59025	2.71575	2.87675	2.686	2.661	2.48925	2.453	2.6135	2.5575	2.2465	2.54625	2.4125	2.598	2.2465	2.28925	2.30425	2.43725	2.12975	2.3695	2.4415	1.4935	1.892	2.1625	2.18125	1.86525	1.554	2.05425	2.10125	1.7795	1.5565	1.873	2.0705
31	2.55575	2.7205	2.85425	2.6745	2.64675	2.46975	2.4255	2.60475	2.567	2.229	2.51625	2.465	2.598	2.229	2.278	2.33075	2.46075	2.11475	2.34275	2.4465	1.50025	1.88125	2.14525	2.20575	1.8605	1.54825	2.03725	2.105	1.77	1.585	1.86625	2.04675
31.5	2.5095	2.7045	2.83175	2.65375	2.64175	2.437	2.41025	2.57225	2.567	2.216	2.4975	2.452	2.5705	2.216	2.2575	2.3665	2.478	2.11175	2.34125	2.49075	1.514	1.85875	2.13	2.23125	1.86275	1.563	2.02025	2.11075	1.76225	1.619	1.86325	2.06575
32	2.478	2.693	2.80325	2.62125	2.626	2.43	2.39025	2.5455	2.55475	2.2185	2.495	2.4625	2.55775	2.2185	2.24175	2.399	2.51	2.10375	2.326	2.51475	1.51875	1.8475	2.1235	2.2305	1.85475	1.58025	2.01125	2.10175	1.75175	1.646	1.86875	2.06225
32.5	2.42875	2.667	2.7565	2.5835	2.6015	2.4155	2.3745	2.52675	2.54975	2.20525	2.49075	2.465	2.53125	2.20525	2.236	2.4355	2.48075	2.108	2.318	2.54075	1.52475	1.828	2.11575	2.21425	1.8565	1.58175	1.9905	2.09225	1.73725	1.65225	1.869	2.04975
33	2.39575	2.64325	2.7175	2.5495	2.59175	2.41325	2.36275	2.499	2.52275	2.1915	2.46325	2.494	2.49725	2.1915	2.22325	2.45775	2.45675	2.093	2.312	2.5385	1.529	1.81625	2.101	2.2105	1.854	1.59775	1.97825	2.07325	1.73075	1.66475	1.873	2.02875
33.5	2.37325	2.62925	2.67025	2.50425	2.567	2.39925	2.359	2.478	2.494	2.184	2.44875	2.5125	2.4555	2.184	2.21075	2.479	2.43025	2.086	2.30325	2.55475	1.53725	1.8055	2.0905	2.19775	1.848	1.6115	1.96525	2.06225	1.73625	1.67	1.871	2.0135
34	2.33175	2.593	2.63175	2.4885	2.53825	2.405	2.35675	2.4545	2.46675	2.18525	2.44225	2.51575	2.4115	2.18525	2.20275	2.51925	2.39225	2.08425	2.30625	2.55625	1.5475	1.79675	2.07975	2.1835	1.84225	1.62125	1.9535	2.05525	1.737	1.67125	1.86375	1.99375
34.5	2.3045	2.56425	2.58925	2.47225	2.50975	2.4	2.33825	2.44425	2.43875	2.1855	2.4245	2.51525	2.373	2.1855	2.173	2.50525	2.35075	2.079	2.292	2.592	1.55975	1.78975	2.0615	2.175	1.8395	1.62975	1.93475	2.04775	1.7425	1.6805	1.85275	1.9895
35	2.2795	2.5405	2.553	2.42775	2.48325	2.39375	2.34525	2.4335	2.4215	2.1755	2.424	2.50025	2.3595	2.1755	2.165	2.48275	2.31325	2.075	2.29075	2.536	1.55975	1.78325	2.061	2.1605	1.82925	1.63625	1.925	2.0325	1.75175	1.687	1.849	1.9715
35.5	2.25125	2.50775	2.5245	2.41525	2.44875	2.40025	2.34525	2.42125	2.39375	2.16425	2.40575	2.482	2.33925	2.16425	2.152	2.46725	2.27925	2.07	2.2735	2.51125	1.567	1.778	2.0545	2.14575	1.823	1.651	1.91525	2.02475	1.7605	1.68925	1.84125	1.95875
36	2.22875	2.48975	2.50025	2.401	2.433	2.39175	2.349	2.4085	2.3695	2.1445	2.3955	2.46775	2.33075	2.1445	2.15	2.456	2.26575	2.06125	2.27025	2.48575	1.5685	1.76525	2.04425	2.1325	1.81975	1.6565	1.91275	2.0125	1.76825	1.67775	1.83525	1.94475
36.5	2.204	2.461	2.4735	2.37125	2.4175	2.391	2.351	2.4065	2.3425	2.15025	2.3725	2.45	2.328	2.15025	2.14375	2.4535	2.25175	2.05475	2.2705	2.47275	1.577	1.76525	2.04	2.12675	1.81925	1.666	1.90625	1.999	1.78825	1.681	1.832	1.93875
37	2.181	2.4325	2.44525	2.34375	2.38425	2.388	2.354	2.39075	2.31125	2.155	2.35025	2.40725	2.31775	2.155	2.159	2.43375	2.2375	2.03975	2.2775	2.46875	1.584	1.764	2.03025	2.12375	1.8075	1.66875	1.9005	1.9965	1.79425	1.67275	1.83275	1.93475
37.5	2.1645	2.4225	2.4265	2.307	2.36625	2.38675	2.354	2.385	2.29375	2.1535	2.3345	2.3835	2.31125	2.1535	2.16725	2.4195	2.2205	2.037	2.2845	2.48775	1.58975	1.758	2.035	2.1105	1.8	1.67425	1.897	1.99275	1.80225	1.6825	1.8365	1.94775
38	2.14775	2.4115	2.40625	2.3015	2.355	2.3775	2.347	2.37775	2.28425	2.15175	2.301	2.36625	2.3095	2.15175	2.1715	2.41275	2.19775	2.03675	2.283	2.5025	1.593	1.761	2.0315	2.1055	1.794	1.68125	1.89525	1.99	1.795	1.67925	1.8365	1.935
38.5	2.1305	2.39525	2.38925	2.285	2.34125	2.3915	2.34875	2.366	2.26975	2.14725	2.292	2.35925	2.29575	2.14725	2.19	2.3905	2.178	2.0385	2.286	2.448	1.59225	1.75825	2.032	2.1005	1.79125	1.69175	1.89525	1.9815	1.7895	1.68125	1.838	1.933
39	2.1145	2.4	2.37375	2.264	2.33825	2.37325	2.34375	2.37925	2.2655	2.14425	2.28475	2.35325	2.29175	2.14425	2.2005	2.37925	2.168	2.03375	2.29325	2.419	1.59875	1.75925	2.03075	2.11	1.788	1.69275	1.89625	1.9875	1.78875	1.6775	1.843	1.936
39.5	2.0985	2.38025	2.35	2.2535	2.31675	2.38825	2.35125	2.37525	2.25275	2.142	2.272	2.344	2.28725	2.142	2.20225	2.36825	2.15425	2.042	2.291	2.451	1.595	1.76375	2.03	2.09875	1.78475	1.70475	1.8975	1.98725	1.79525	1.676	1.841	1.9375
40	2.07925	2.36625	2.342	2.2485	2.301	2.394	2.349	2.3635	2.24225	2.146	2.2735	2.3285	2.28875	2.146	2.2105	2.35775	2.138	2.03775	2.2905	2.4025	1.59825	1.7715	2.02925	2.09875	1.784	1.7065	1.894	1.9905	1.79825	1.67675	1.84075	1.94525
40.5	2.0645	2.383	2.3295	2.23025	2.298	2.4015	2.35725	2.3645	2.23675	2.148	2.2805	2.32675	2.2935	2.148	2.21425	2.35	2.1285	2.0375	2.2895	2.4545	1.59875	1.77175	2.02925	2.0945	1.7825	1.70175	1.887	1.99	1.80125	1.673	1.84475	1.9495
41	2.05625	2.376	2.31825	2.226	2.2775	2.38825	2.349	2.35825	2.226	2.132	2.269	2.31125	2.30075	2.132	2.21775	2.3445	2.122	2.034	2.2835	2.382	1.603	1.7775	2.0255	2.09325	1.7785	1.70275	1.889	1.99275	1.80275	1.66475	1.84325	1.95325
41.5	2.04625	2.3635	2.2985	2.2115	2.268	2.40425	2.355	2.36425	2.21725	2.133	2.26425	2.314	2.3025	2.133	2.21475	2.337	2.1155	2.038	2.27875	2.383	1.60375	1.78325	2.02675	2.0965	1.78325	1.69825	1.88475	1.9955	1.806	1.6595	1.84025	1.96575
42	2.03725	2.36575	2.2945	2.1895	2.2635	2.39275	2.36175	2.34975	2.21325	2.13375	2.2525	2.298	2.30675	2.13375	2.21325	2.32775	2.12	2.031	2.26775	2.427	1.6095	1.786	2.0195	2.0975	1.79125	1.6935	1.883	1.9965	1.81325	1.65375	1.837	1.975
42.5	2.02975	2.36625	2.2855	2.1815	2.247	2.4015	2.369	2.352	2.20425	2.133	2.2575	2.2995	2.3075	2.133	2.21775	2.33775	2.1135	2.029	2.26825	2.42	1.6165	1.7915	2.01725	2.0985	1.79275	1.69075	1.883	2.0065	1.81825	1.64475	1.83625	1.98875
43	2.0205	2.3715	2.27475	2.185	2.242	2.40075	2.3745	2.35425	2.19925	2.13975	2.26225	2.3015	2.3135	2.13975	2.2255	2.3095	2.11575	2.024	2.2645	2.44025	1.61225	1.803	2.011	2.09975	1.79375	1.68675	1.8845	2.01075	1.8225	1.63375	1.8345	2.001
43.5	2.02025	2.388	2.26575	2.16775	2.2335	2.38725	2.36825	2.355	2.19575	2.1315	2.25425	2.2995	2.31025	2.1315	2.22775	2.33275	2.121	2.02175	2.26175	2.443	1.61625	1.812	2.006	2.103	1.79575	1.68125	1.88025	2.017	1.82675	1.62775	1.8315	2.01975
44	2.01175	2.374	2.25275	2.15725	2.22725	2.37825	2.3745	2.347	2.18175	2.13125	2.25875	2.29025	2.2995	2.13125	2.21975	2.3115	2.12375	2.01325	2.25475	2.42525	1.621	1.8145	1.996	2.1125	1.794	1.66875	1.87625	2.019	1.831	1.6085	1.82525	2.035
44.5	2.01575	2.38775	2.244	2.159	2.22475	2.38125	2.36675	2.36075	2.18	2.13625	2.252	2.2955	2.28825	2.13625	2.21525	2.30675	2.12575	2.00875	2.247	2.3895	1.62725	1.82675	1.9885	2.1225	1.79575	1.65525	1.873	2.03375	1.83775	1.595	1.821	2.05575
45	2.017	2.38725	2.24175	2.15	2.22075	2.36225	2.3745	2.3625	2.18275	2.12725	2.26025	2.296	2.28125	2.12725	2.23175	2.3005	2.135	1.99675	2.24725	2.378	1.6275	1.82775	1.986	2.11875	1.803	1.642	1.8705	2.04075	1.84225	1.57775	1.8155	2.062
45.5	2.015	2.383	2.23625	2.148	2.21575	2.3705	2.3825	2.3575	2.17225	2.12275	2.25525	2.284	2.27425	2.12275	2.22525	2.30275	2.13625	1.9855	2.24425	2.43425	1.6345	1.832	1.981	2.118	1.80475	1.62775	1.87075	2.0555	1.84325	1.577	1.8105	2.067
46	2.013	2.38775	2.238	2.1435	2.2205	2.3635	2.37325	2.36625	2.17375	2.11725	2.2535	2.29	2.2705	2.11725	2.236	2.2975	2.14675	1.9795	2.235	2.4355	1.6335	1.8285	1.979	2.12975	1.80475	1.61575	1.868	2.07025	1.84525	1.57025	1.80675	2.09625
46.5	2.00725	2.38425	2.22825	2.13975	2.21825	2.34725	2.37975	2.37275	2.1655	2.111	2.255	2.29575	2.25525	2.111	2.24125	2.307	2.14975	1.96775	2.23	2.46425	1.63575	1.82575	1.9755	2.1515	1.805	1.59975	1.86175	2.0675	1.85025	1.55825	1.80175	2.0975
47	2.0035	2.386	2.2365	2.13875	2.21675	2.357	2.36875	2.36875	2.169	2.104	2.2505	2.299	2.24325	2.104	2.2275	2.30075	2.15575	1.95775	2.22025	2.42475	1.6395	1.826	1.9735	2.136	1.80575	1.586	1.8555	2.08875	1.85225	1.559	1.80025	2.09425
47.5	2.008	2.39025	2.216	2.1395	2.22075	2.339	2.367	2.36375	2.17175	2.09075	2.241	2.30075	2.234	2.09075	2.23175	2.309	2.15925	1.94675	2.20775	2.39	1.63875	1.82825	1.9725	2.14325	1.8045	1.57775	1.85025	2.101	1.8455	1.55025	1.794	2.09325
48	2.00675	2.38675	2.2205	2.14525	2.21125	2.32675	2.36325	2.38075	2.17175	2.08425	2.2455	2.31125	2.22325	2.08425	2.22475	2.3065	2.16175	1.93925	2.20775	2.4025	1.644	1.821	1.96475	2.1555	1.7995	1.56525	1.84425	2.10775	1.84925	1.54525	1.791	2.09275

## Sheet: Figure 3c-e
pH	Log2 FC Lag t ammonia/pH				Log 2 FC Td ammonia/pH				Log 2 FC OD600 at t=48 h ammonia/pH
8.05	0	0	0	0	0.0285	-0.38	-0.135	0.0486	-0.009	0.0081	0.0511	0.036
8.96	-1.6	-1.1	-0.6	-0.7	-0.199	-0.43	-0.169	-0.068	-0.151	-0.224	-0.11	-0.083
9.38	-1.6	-1.9	-2.1	-1.4	-0.16231	-0.615	-0.428	-0.257	-0.270801	-0.463	-0.259	-0.294
9.73	-4.49185	-6.34	-6.022	-4.17	-0.465916	-0.161	-0.544	-0.261	-0.355435	-0.325	-0.095	-0.202
10.18	-5.88874	-5.275	-5.948	-5.497	-0.16801	-0.111	-0.065	-0.448	-0.63442	-0.38	-0.439	-0.3
10.49									6.1129	5.1527	5.2341	5.6406
10.78									5.3933	5.4235	4.3471	5.3588

[truncated: 2 more sheets: Figure 3f, Figure 5&6 Metabolomics dataset]
